# Supplementary material
Source: PubMed Central journal article supplement (PMC7963812)
Supplement: 16-00800.pdf [file 16-00800.pdf]

**On-line Table: Patient characteristics**

| Patient No.     | Age, yr | Sex | Location | Size, mm | Dual-Antiplatelet Regimen                | Complications | 1st Follow-Up, mo | % Occlusion | 2nd Follow-Up, mo | % Occlusion | Retreatment        |
|-----------------|---------|-----|----------|----------|------------------------------------------|---------------|-------------------|-------------|-------------------|-------------|--------------------|
| 1               | 61      | F   | L MCA    | 20.6     | ASA 81 mg + ticagrelor 90 mg twice a day | No            | 5.7               | >90         | NA                | NA          | No                 |
| 2               | 34      | F   | L ICAB   | 11.5     | ASA 81 mg + ticagrelor 90 mg twice a day | No            | 6.5               | <90         | NA                | NA          | No                 |
| 3               | 66      | F   | L PO     | 4.5      | ASA 81 mg + ticagrelor 90 mg twice a day | No            | 4.3               | <90         | 10.4              | <90         | No                 |
| 4               | 71      | M   | L PO     | 6.6      | ASA 325 mg + clopidogrel 75 mg           | No            | 4.2               | <90         | 11.0              | <90         | No                 |
| 5               |         |     | R PO     | 4.6      | ASA 325 mg + clopidogrel 75 mg           | No            | 6.8               | <90         | NA                | NA          | No                 |
| 6               | 31      | F   | R PO     | 3.9      | ASA 81 mg + ticagrelor 90 mg twice a day | No            | 4.2               | <90         | 10.2              | <90         | 2nd PED at 15.1 mo |
| 7               | 55      | F   | R PO     | 6.1      | ASA 325 mg + clopidogrel 75 mg           | No            | 5.7               | <90         | NA                | NA          | No                 |
| 8               | 62      | F   | R PCOMM  | 7.3      | ASA 325 mg + clopidogrel 75 mg           | No            | 6.3               | <90         | NA                | NA          | No                 |
| 9               | 64      | F   | R PO     | 7.1      | ASA 325 mg + clopidogrel 75 mg           | No            | 5.4               | <90         | NA                | NA          | No                 |
| 10 <sup>a</sup> | 44      | F   | R PO     | 6.5      | ASA 325 mg + clopidogrel 75 mg           | No            | 6.0               | <90         | 12.2              | <90         | 2nd PED at 12.7 mo |

**Note:**—ASA indicates acetylsalicylic acid; ICAB, internal carotid artery bifurcation; NA, not available; PCOMM, posterior communicating artery; PO, paraophthalmic artery.

<sup>a</sup> Optical coherence tomography.
